# Supplementary material
Source: PubMed Central journal article supplement (PMC6314141)
Supplement: supp_RA118.003758_137840_2_supp_226884_phhxbs.pdf [file supp_RA118.003758_137840_2_supp_226884_phhxbs.pdf]

**Supporting Table 1:** Analysis of Satellite Cell (SC) proliferation and differentiation in single muscle fiber cultures in the presences and absents of MLIP exon 1a. Mean  $\pm$  StDev, (n).\* Holm-Bonferroni.

| Time in Culture (hrs) | Control, SC/fiber    | Exon 1a Nulls, SC/fiber | p-value* |
|-----------------------|----------------------|-------------------------|----------|
| 0                     | 5.3 $\pm$ 4.1 (179)  | 4.5 $\pm$ 2.8 (187)     | NS       |
| 48                    | 12.2 $\pm$ 6.7(134)  | 9.5 $\pm$ 4.5 (112)     | 0.0033   |
| 72                    | 21.4 $\pm$ 10.1(110) | 20.7 $\pm$ 10.1         | NS       |

| Time in Culture (hrs) | Control, %Pax7 <sup>+</sup> | Exon 1a Nulls, %Pax7 <sup>+</sup> | p-value* |
|-----------------------|-----------------------------|-----------------------------------|----------|
| 0                     | 91.3 $\pm$ 20.4 (173)       | 95.6 $\pm$ 15.8 (183)             | NS       |
| 48                    | 14.6 $\pm$ 12.7 (133)       | 16.6 $\pm$ 14.8 (112)             | NS       |
| 72                    | 33.1 $\pm$ 16 (110)         | 26.4 $\pm$ 17.3 (119)             | 0.0173   |

| Time in Culture (hrs) | Control, %Pax7+MyoD   | Exon 1a Nulls, %Pax7+MyoD | p-value*              |
|-----------------------|-----------------------|---------------------------|-----------------------|
| 0                     | 7.77 $\pm$ 18.9 (173) | 8.22 $\pm$ 25.2 (183)     | NS                    |
| 48                    | 79.2 $\pm$ 16.7 (133) | 80.4 $\pm$ 15.6 (112)     | NS                    |
| 72                    | 30.7 $\pm$ 18 (110)   | 43.3 $\pm$ 21.7 (119)     | 2.66x10 <sup>-5</sup> |

| Time in Culture (hrs) | Control, %MyoD <sup>+</sup> | Exon 1a Nulls, %MyoD <sup>+</sup> | p-value* |
|-----------------------|-----------------------------|-----------------------------------|----------|
| 0                     | 0.35 $\pm$ 2.62 (173)       | 0.11 $\pm$ 1.48 (183)             | NS       |
| 48                    | 6.19 $\pm$ 10.5 (133)       | 2.98 $\pm$ 5.64 (112)             | NS       |
| 72                    | 36.2 $\pm$ 18.3 (110)       | 30.3 $\pm$ 16 (119)               | 0.0006   |

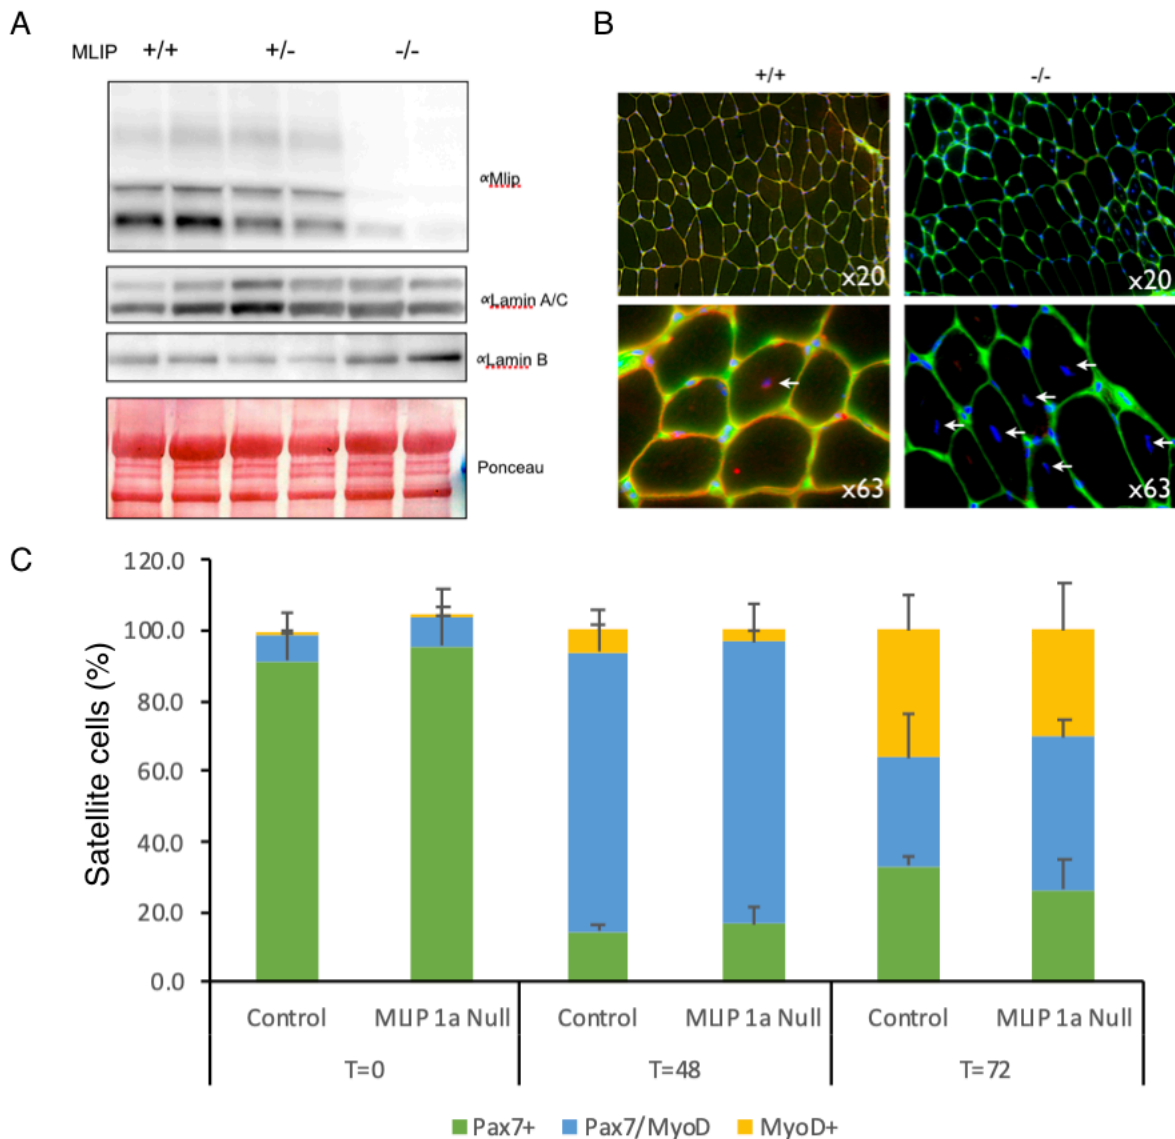

**Supporting Figure 1: Increased prevalence of centralized nuclei in skeletal muscle fibers of mice lacking MLIP exon1a.**

A. Loss of Mlip protein expression in skeletal muscle isolated from MLIP<sup>-/-</sup> mice. Equal total protein (70ug/well) was resolved by SDS-PAGE with specific proteins (MLIP, Lamin A/C and Lamin were detected by western analysis. B. Hind leg muscles of 8 week old mice of Wildtype (+/+) and MLIP<sup>-/-</sup> genotype. B. MLIP null skeletal muscle exhibited increased prevalence of Centralized nuclei. 91 WT fibers had 3 centralized nuclei (White arrow) (3.3%) as compared to 82 MLIP null fibers having 19 centralized nuclei, 23.2%. MLIP (red), wheatgerm agglutinin (green), DAPI (Blue). C. Quantification of the number of satellite cell's expressing early fate decision markers, Pax7 and/or MyoD on single muscle fibers in culture, expressed as a percentage of the total number of SCs (>30 fibers per treatment per mouse; n = 4 mice).
